# Supplementary material
Source: publisher figshare collection journal article supplement (https://sage.figshare.com/ndownloader/files/13993181)
Supplement: Supplementary file 1 [file 13993181]

## WEB APPENDIX A: IDENTIFICATION & SELECTION OF ARTICLES

We performed an online literature search to identify studies examining organizational responses to service failures. We searched for articles in the various databases (i.e. Web of Science, Emerald Insight, and Science Direct) using the following keywords: ‘service recovery’, ‘service failure’, ‘customer complaining’, ‘customer complaint’, ‘complaint handling’, ‘complaint management’, and ‘customer dissatisfaction’. We also conducted an issue-by-issue search of journals frequently reporting service recovery studies: *Journal of Service Research*, *International Journal of Service Industry Management*/*Journal of Service Management*, *Journal of Services Marketing*, *Journal of Service Theory and Practice*/*Managing Service Quality*, *Service Business*, *Journal of Business Research*, *Journal of Consumer Satisfaction, Dissatisfaction and Complaining Behavior*, *Journal of Hospitality and Tourism Research*, and *International Journal of Hospitality Management*. Finally, we performed a reference analysis of prominent articles in the literature (e.g. Davidow 2003, Gelbrich and Roschk 2011a; Orsingher, Valentini, and de Angelis 2010; Smith, Bolton and Wagner 1999). This process generated more than 500 articles for review, covering the period 1975 to the beginning of 2018.

In the next stage, we selected articles for inclusion using the following criteria. First, we only included articles which have gone through a rigorous review process, thus eliminating business press articles, doctoral dissertations, master theses, and conference proceedings listed in the databases. This first step narrowed down the number of articles for review to 344. In a second step, we read these articles in detail. Given our focus on organizational responses to service failures, articles had to deal with discrete organizational responses after service failures. 110 articles were excluded as they focused only on customer reactions to service failures, examined perceived justice without studying specific recovery options, examined the effects of service recovery *in general*, or examined employee or organization perspectives to

service recovery. We also had to exclude four articles from our database as we could not retrieve a hard copy or digital copy of the article. We ultimately retained 230 articles studying discrete organizational responses to service failures.

Next, we read all 230 articles to identify the different response options. Articles were coded in terms of the specific organizational response option(s) under examination, the customer outcomes used to evaluate the effectiveness of the recovery option (e.g. perceived justice, customer satisfaction, customer loyalty), and study characteristics (e.g. method, service setting). Afterwards, we listed all potential response options identified in literature. Studies examining the same organizational responses under different terms (e.g. apology and psychological compensation, compensation and atonement) were grouped together based on their definition. We assigned labels to the variables depending on the frequency of use throughout the literature (e.g. psychological compensation was coded under the more commonly used term ‘apology’). As mentioned in the paper, we identified 22 different organizational responses to service failures in literature (see Table 1 in the paper).

Finally, the four authors classified the 22 organizational response options identified in prior literature along the pre-recovery, recovery, and post-recovery phases of the recovery journey based on theoretical grounds. In a next step, the four authors further subdivided the organizational response options within each phase of the recovery journey using Gelbrich and Roschk’s (2011) three-dimensional classification of organizational responses to service failures (i.e. compensation, favorable employee behavior, and organizational procedures). This resulted in a 3 (pre-recovery, recovery, post-recovery) by 3 (compensation, favorable employee behavior, organizational procedures) classification of organizational response options reported in extent literature (see Figure 1 in the paper). The intercoder reliability for classifying the 22 response options in the 3 by 3 framework, calculated as Krippendorff’s

alpha (see Hayes and Krippendorff 2007 for more information) suggested a high level of agreement among the four coders (> 90%). Inconsistencies were resolved through discussion.

## References

- Davidow, Moshe (2003), "Organizational responses to customer complaints: What works and what doesn't," *Journal of Service Research*, 5(3), 225-250.
- Gelbrich, Katja and Holger Roschk (2011a). "A meta-analysis of organizational complaint handling and customer responses," *Journal of Service Research*, 14(1), 24-43.
- Hayes, Andrew F. and Klaus Krippendorff, (2007), "Answering the call for a standard reliability measure for coding data," *Communication Methods and Measures*, 1(1), 77-89.
- Orsingher, Chiara, Sara Valentini, and Matteo de Angelis (2010), "A meta-analysis of satisfaction with complaint handling in services," *Journal of the Academy of Marketing Science*, 38(2), 169-186.
- Smith, Amy K., Ruth N. Bolton and Janet Wagner (1999), "A model of customer satisfaction with service encounters involving failure and recovery," *Journal of Marketing Research*, 36(3), 356-372.

## WEB APPENDIX B: LIST OF RETAINED ARTICLES

1. Ashley, Christy and Sajeew Varki (2009), "Loyalty and its influence on complaining behavior and service recovery satisfaction," *Journal of Consumer Satisfaction, Dissatisfaction, and Complaining Behavior*, 22, 21-35.
2. Baker, Thomas and Tracey Meyer (2014), "Explanation information and source in service recovery initiatives," *Journal of Services Marketing*, 28(4), 311-318.
3. Bambauer-Sachse, Silke and Landisoa E. Rabeson (2015), "Determining adequate tangible compensation in service recovery processes for developed and developing countries: The role of severity and responsibility," *Journal of Retailing and Consumer Services*, 22, 117-127.
4. Bambauer-Sachse, Silke and Landisoa E. Rabeson (2015), "Service recovery for moderate and high involvement services," *Journal Services Marketing*, 29(5), 331-343.
5. Basso, Kenny and Christiane Pizzutti (2016), "Trust recovery following a double deviation", *Journal of Service Research*, 19(2), 209-223.
6. Bitner, Mary J. (1990), "Evaluating service encounters: The effects of physical surroundings and employee responses," *Journal of Marketing*, 54 (April), 69-82.
7. Bitner, Mary J., Bernard H. Booms and Mary S. Tetreault (1990), "The service encounter: Diagnosing favorable and unfavorable incidents," *Journal of Marketing*, 54 (January), 71-84.
8. Blodgett, Jeffrey G., Donna J. Hill and Stephen S. Tax (1997), "The effects of distributive, procedural, and interactional justice on postcomplaint behavior," *Journal of Retailing*, 73(2), 185-210.
9. Bolting, Claire P. (1989), "How do customers express dissatisfaction and what can service marketers do about it," *Journal of Services Marketing*, 3 (2), 5-23.

10. Bolkan, San and John A. Daly (2009), "Organizational responses to customer complaints: An examination of effective remediation tactics," *Journal of Applied Communication Research*, 37(1), 21-39.
11. Bonifield, Carolyn and Catherine C. Cole (2008), "Better him than me: Social comparison theory and service recovery," *Journal of the Academy of Marketing Science*, 36(4), 565-577.
12. Boshoff, Christo (1997), "An experimental study of service recovery options," *International Journal of Service Industry Management*, 8 (2), 110-30.
13. Boshoff, Christo (1999), "RECOVSAT: An instrument to measure satisfaction with transaction-specific service recovery," *Journal of Service Research*, 1(3), 236-249.
14. Boshoff, Christo (2005), "A re-assessment and refinement of RECOVSAT: An instrument to measure satisfaction with transaction-specific service recovery," *Managing Service Quality*, 15(5), 410-425.
15. Boshoff, Christo and Jason Leong (1998), "Empowerment, attribution and apologising as dimensions of service recovery: An experimental study," *International Journal of Service Industry Management*, 9(1), 24-47.
16. Bradley, Graham and Beverley A. Sparks (2009), "Dealing with service failures: The use of explanations," *Journal of Travel and Tourism Marketing*, 26(2), 129-143.
17. Bradley, Graham and Beverley A. Sparks (2012), "Explanations: if, when, and how they aid service recovery," *Journal of Services Marketing*, 26(1), 41-51.
18. Brady, Michael K., J. Joseph Cronin Jr., Gavin L. Fox and Michelle L. Roehm (2008), "Strategies to offset performance failures: The role of brand equity," *Journal of Retailing*, 84(2), 151-164.

19. Brown, Stephen W., Deborah L. Cowles, and Tracy L. Tuten (1996), "Service recovery: Its value and limitations as a retail strategy," *International Journal of Service Industry Management*, 7(5), 32-46.
20. Butcher, Ken and Troy Hefferman (2006), "Social regard: A link between waiting for service and service outcomes," *International Journal of Hospitality Management*, 25(1), 34-53.
21. Cambra-Fierro, Jesus, Iguacel Melero-Polo and F. Javier Sese (2014), "Does the nature of the relationship really matter? An analysis of the roles of loyalty and involvement in service recovery processes," *Service Business*, 9, 297-320.
22. Cambra-Fierro, Jesus, Iguacel Melero-Polo and F. Javier Sese (2016), "Can complaint-handling efforts promote customer engagement?," *Service Business*, 10(4), 847-866.
23. Cambra-Fierro, Jesus, Iguacel Melero-Polo and F. Javier Sese (2015), "Managing complaints to improve customer profitability," *Journal of Retailing*, 91(1), 109-124.
24. Casado-Diaz, Ana B. and Juan L. Nicolau-Gonzalbez (2009), "Explaining consumer complaining behavior in double deviation scenarios", *Service Industries Journal*, 29(12), 1659-1668.
25. Chalmers, Sally (2016), "Ethical fairness in financial services complaint handling," *International Journal of Bank Marketing*, 34(4), 570-586.
26. Chang, Chia-Chi (2008). "Choice, perceived control, and customer satisfaction: The psychology of online service recovery", *Cyber Psychology and Behavior*, 11(3), 321-328.
27. Chang, Chia-Chi and Chia-Yi Chen (2013), "Alleviating the negative impact of delayed recovery: process- versus outcome-focused explanations," *Journal of Services Marketing*, 27(7), 564-571.

28. Chang, Dong-Shang and Tao-Hsing Wang (2012), "Consumer preferences for service recovery options after delivery delay when shopping online," *Social Behavior and Psychology: An International Journal*, 40(6), 1033-1043.
29. Chen, WeiWei and Hsiao-Ching Lee (2018), "How to explain service failure? Impacts of justifications," *Service Business*, 12(2), 331-356.
30. Chern Boo, Huey, Anna S. Mattila, and Ching Yeng Tan (2013), "Effectiveness of recovery actions on deviant customer behavior: The moderating role of gender," *International Journal of Hospitality Management*, 35(1), 180-192.
31. Cheung, Fung Yi Millissa, and Wai Ming To (2016), "A customer-dominant logic on service recovery and customer satisfaction," *Management Decision*, 54(10), 2524-2543.
32. Cheung, Fung Yi Millissa, and Wai Ming To (2017), "The effect of organizational responses to service failures on customer satisfaction perception," *Service Business*, 11(4), 767-784.
33. Chuang, Shih-Chieh, Yin-Hui Cheng, Chai-Jung Chang and Shun-Wen Yang (2012), "The effect of service failure types and service recovery on customer satisfaction: A mental accounting perspective," *Service Industries Journal*, 32(2), 257-271.
34. Clark, Gary L., Peter F. Kaminski and David R. Rink (1992), "Consumer complaints: Advice on how companies should respond based on an empirical study," *Journal of Consumer Marketing*, 9(3), 5-14.
35. Clopton, Stephen W., James E. Stoddard and Jennifer W. Clay (2001), "Salesperson characteristics affecting consumer complaint responses," *Journal of Consumer Behaviour*, 1(2), 124-39.
36. Collie, Thérèse A., Beverley A. Sparks and Graham Bradley (2000), "Investing in interactional justice: A study of the fair process effect within a hospitality failure context," *Journal of Hospitality and Tourism Research*, 24(4), 448-72.

37. Collie, Thérèse A., Beverley A. Sparks and Graham Bradley (2002), "Fair process revisited: Differential effects of interactional and procedural justice in the presence of social comparison information," *Journal of Experimental Social Psychology*, 38, 545–555.
38. Conlon, Donald E. and Noel M. Murray (1996), "Customer perceptions of corporate responses to product complaints: The role of explanations," *Academy of Management Journal*, 39(4), 1040-1056.
39. Craighead, Christopher W., Kirk R. Karwan and Janis L. Miller (2004), "The effect of severity of failure and customer loyalty on service recovery strategies," *Production and Operations Management*, 13(4), 307-321.
40. Cranage, David (2004), "Plan to do it right: and plan for recovery," *International Journal of Contemporary Hospitality Management*, 16(4), 210-219.
41. Cranage, David (2004), "Conservative choice, service failure, and customer loyalty: Testing the limits of informed choice," *Journal of Hospitality and Tourism Research*, 28(3), 327-345.
42. Cranage, David and Anna S. Mattila (2006), "Service recovery and pre-emptive strategies for service failure: Both lead to customer satisfaction and loyalty, but for different reasons," *Journal of Hospitality and Leisure Marketing*, 13(3-4), 161-181.
43. Davidow, Moshe (2000), "The bottom-line impact of organizational responses to customer complaints," *Journal of Hospitality and Tourism Research*, 24(4), 473-490.
44. Davidow, Moshe (2003), "Organizational responses to customer complaints: What works and what doesn't," *Journal of Service Research*, 5(3), 225-250.
45. Davidow, Moshe (2014), "The A-CRAFT model of organizational responses to customer complaints and their impact on post-complaint customer behavior," *Journal of Consumer Satisfaction, Dissatisfaction, and Complaining Behavior*, 27(1), 70-89



46. Davidow, Moshe and James H. Leigh (1998), "The effects of organizational complaint responses on consumer satisfaction, word of mouth activity and repurchase intentions," *Journal of Consumer Satisfaction, Dissatisfaction, and Complaining Behavior*, 11, 91-102.
47. de Ruyter, Ko and Martin Wetzels (2000), "Customer equity considerations in service recovery: A cross-industry perspective," *International Journal of Service Industry Management*, 11(1), 91-108.
48. Dens, Nathalie, Patrick De Pelsmacker and Nathalia Purnawirawan (2015), "We(b)care: How review set balance moderates the appropriate response strategy to negative online reviews," *Journal of Service Management*, 26(3), 486-515.
49. DeWitt, Tom, Doan T. Nguyen, and Roger Marshall (2008), "Exploring customer loyalty following service recovery: The mediating effects of trust and emotions," *Journal of Service Research*, 10(3), 269-281.
50. Dong, BeiBei, Kenneth R. Evans and Shaoming Zou (2008), "The effects of customer participation in co-created service recovery," *Journal of the Academy of Marketing Science*, 36(1), 123-137.
51. Dong, BeiBei, K. Sivakumar, Kenneth R. Evans, and Shaoming Zou (2016), "Recovering coproduced service failures: Antecedents, consequences, and moderators of locus of recovery," *Journal of Service Research*, 19(3), 291-306.
52. Duffy, Jo Ann M., John M. Miller and James B. Bexley (2006), "Banking customers' varied reactions to service recovery strategies," *International Journal of Bank Marketing*, 24(2), 112-132.
53. Dunning, Jarad, Aron O'Cass and Anthony Pecotich (2004), "Retail sales explanations: Resolving unsatisfactory sales encounters," *European Journal of Marketing*, 38(11/12), 1541-1561.

54. Dunning, Jarad, Anthony Pecotich and Aron O'Cass (2004), "What happens when things go wrong? Retail sales explanations and their effects," *Psychology and Marketing*, 21(7), 553-572.
55. Durvasula, Srinivas, Steven Lysonski and Subhash C. Mehta (2000), "Business to business marketing: Service recovery and customer satisfaction issues with ocean shipping lines," *European Journal of Marketing*, 34 (3/4), 433-52.
56. Edvardsson, Bo, Bård Tronvoll, and Ritva Höykinpuro (2011), "Complex service recovery processes: how to avoid triple deviation," *Managing Service Quality*, 21(4), 331-349.
57. Einwiller, Sabine A. and Sarah Steilen (2015), "Handling complaints on social network sites – An analysis of complaints and complaint responses on Facebook and Twitter pages of large US companies," *Public Relations Review*, 41(2), 195-204.
58. Ekiz, Erdogan H. and Huseyin Arasli (2007), "Measuring the impacts of organizational responses: Case of Northern Cyprus hotels," *Managing Global Transitions*, 5(3), 271-287.
59. Estelami, Hooman (2000), "Competitive and procedural determinants of delight and disappointment in customer complaint outcomes," *Journal of Service Research*, 2(3), 285-300.
60. Evantschitzky, Heiner, Christian Brock and Markus Blut (2011), "Will you tolerate this? The impact of affective commitment on complaint intention and post-recovery behavior," *Journal of Service Research*, 14(4), 410-425.
61. Fan, Yinig and Run Hong Niu (2016), "To tweet or not to tweet? Exploring the effectiveness of service recovery strategies using social media," *International Journal of Production and Operation Management*, 36(9), 1014-1036.

62. Fang, Zheng, Xueming Luo and Minghua Jiang (2013), "Quantifying the dynamic effects of service recovery on customer satisfaction: Evidence from chinese mobile phone markets," *Journal of Service Research*, 16(3), 341-355.
63. Forbes, Lukas P., Scott W. Kelley and K. Douglas Hoffman (2005), "Typologies of e-commerce retail failures and recovery strategies," *Journal of Services Marketing*, 19(5), 280-292.
64. Fu, Hui, Doris C. Wu, Songshan (Sam) Huang, Haiyan Song and Jinhong Gong (2015), "Monetary or nonmonetary compensation for service failure? A study of customer preferences under various loci of causality," *International Journal of Hospitality Management*, 46, 55-64.
65. Garrett, Dennis E. (1999), "The effectiveness of compensation given to a complaining consumer: Is more better?," *Journal of Consumer Satisfaction, Dissatisfaction, and Complaining Behavior*, 12, 26-34.
66. Gelbrich, Katja (2010), "Anger, frustration, and helplessness after service failure: Coping strategies and effective informational support," *Journal of the Academy of Marketing Science*, 38(5), 567-585.
67. Gelbrich, Katja and Roschk, Holger (2011a), "A meta-analysis of organizational complaint handling and customer responses," *Journal of Service Research*, 14(1), 24-43.
68. Gelbrich, Katja and Roschk, Holger (2011b). "Do complainants appreciate overcompensation? A meta-analysis on the effect of simple compensation vs. overcompensation on post-complaint satisfaction," *Marketing Letters*, 22(1), 31-47.
69. Gelbrich, Katja, Gäthke, Jana, and Grégoire, Yany (2015), "How much compensation should a firm offer for a flawed service? An examination of the nonlinear effects of compensation on satisfaction," *Journal of Service Research*, 18(1), 107-123.

70. Gelbrich, Katja, Gäthke, Jana, and Grégoire, Yany (2016), "How a firm's best versus normal customers react to compensation after service failure," *Journal of Business Research*, 69(10), 4331-4339.
71. Gilly, Mary C. (1987), "Postcomplaint processes: From organizational response to repurchase behavior," *Journal of Consumer Affairs*, 21 (2), 293-313.
72. Gilly, Mary C. and Betsy D. Gelb (1982), "Post-purchase consumer processes and the complaining consumer," *Journal of Consumer Research*, 9(2), 323-328.
73. Gohary, Ali, Bahman Hamzelu, and Hamid Alizadeh (2016), "Please explain why it happened! How perceived justice and customer involvement affect post co-recovery evaluations: A study of Iranian online shoppers," *Journal of Retailing and Consumer Services*, 31 (July), 127-142.
74. Gohary, Ali, Bahman Hamzelu, Lida Pourazizi, and Heidarzadeh Hanzae, K. (2016), "Understanding the effects of co-creation on cognitive, affective, and behavioral evaluations in service recovery: An ethnocultural analysis," *Journal of Retailing and Consumer Services*, 31 (July), 182-198.
75. Goodwin, Cathy and Ivan Ross (1989), "Salient dimensions of perceived fairness in resolution of service complaints," *Journal of Consumer Satisfaction, Dissatisfaction and Complaining Behavior*, 2, 87-98.
76. Goodwin, Cathy and Ivan Ross (1992), "Consumer responses to service failures: Influence of procedural and interactional fairness perceptions," *Journal of Business Research*, 25(2), 149-163.
77. Goudarzi, Kiane, Adilson Borges and Jean-Charles Chebat (2013), "Should retailers pay to bring customers back? The impact of quick response and coupons on purchase outcomes," *Journal of Business Research*, 66, 665-669.

78. Grewal, Dhruv, Anne L. Roggeveen and Michael Tsiros (2008), "The effect of compensation on repurchase intentions in service recovery," *Journal of Retailing*, 84(4), 424-434.
79. Gruber, Thorsten (2011), "I want to believe they *really care*: How complaining customers want to be treated by frontline employees," *Journal of Service Management*, 22(1), 85-110.
80. Gruber, Thorsten, Isabelle Szmigin, and Roediger Voss (2009). "Handling customer complaints effectively. A comparison of the value maps of female and male complainants," *Managing Service Quality*, 19(6), 636-656.
81. Guchait, Priyanko, Min Guyng Kim and Karthik Namasivayam (2012), "Error management at different organizational levels – Frontline, manager, and company," *International Journal of Hospitality Management*, 31(1), 12-22.
82. Guo, Lin, Sherry L. Lotz, Chuanyi Tang and Thomas W. Gruen (2016), "The role of perceived control in customer value cocreation and service recovery evaluation, " *Journal of Service Research*, 19(1), 39-56.
83. Gursoy, Dogan, Erdogan H. Ekiz and Christina G. Chi (2007), "Impacts of organizational responses on complainants' justice perceptions and post-purchase behaviors," *Journal of Quality Assurance in Hospitality and Tourism*, 8(1), 1-25.
84. Ha, Jooyeon and SooCheong (Shawn) Jang (2009), "Perceived justice in service recovery and behavioral intentions: The role of relationship quality," *International Journal of Hospitality Management*, 28, 319–327.
85. Harris, Katherine E., Dhruv Grewal, Lois A. Mohr, and Kenneth L. Bernhardt (2006), "Consumer responses to service recovery strategies: the moderating role of online versus offline environment," *Journal of Business Research*, 59(4), 425-431.

86. Hazée, Simon, Yves Van Vaerenbergh and Vincent Armirotto (2017), "Co-creating service recovery after service failure: The role of brand equity," *Journal of Business Research*, 75(May), 101-109.
87. Heidenreich, Sven, Kristina Wittkowski, Matthias Handrich and Thomas Falk (2015), "The dark side of customer co-creation: exploring the consequences of failed co-created services," *Journal of the Academy of Marketing Science*, 43(2), 279-296.
88. Hennenberg, Stephan C., Thorsten Grüber, Alexander Reppel, Bahar Ashnai, and Peter Naudé (2009), "Complaint management expectations: An online laddering analysis of small versus large firms," *Industrial Marketing Management*, 38(6), 584-598.
89. Hess, Ronald L., Jr., Shankar Ganesan, and Klein, Noemi M. (2003), "Service failure and recovery: the impact of relationship factors on customer satisfaction," *Journal of the Academy of Marketing Science*, 31, 127–145.
90. Hibbert, Sally A., Maria G. Piacentini and Margaret K. Hogg (2012), "Service recovery following dysfunctional consumer participation," *Journal of Consumer Behavior*, 11(4), 329-338.
91. Hill, Donna J. and Baer, R. (1994), "Customers complain – Business make excuses: The effects of linkage and valence," *Advances in Consumer Research*, 21, 399-405.
92. Hocutt, Mary Ann, Michael R. Bowers and D. Todd Donovan (2006), "The art of service recovery: Fact or fiction?" *Journal of Services Marketing*, 20(3), 199-207.
93. Hocutt, Mary Ann, Goutam Charkraborty and John C. Mowen (1997), "The impact of perceived justice on customer satisfaction and intention to complain in a service recovery," *Advances in Consumer Research*, 24(1), 457–463.
94. Hocutt, Mary Ann and Thomas H. Stone (1998), "The impact of employee empowerment on the quality of a service recovery effort," *Journal of Quality Management*, 3(1), 117-132.

95. Hoffman, K Douglas, and Beth G. Chung (1999), "Hospitality recovery strategies: Customer preferences versus firm use," *Journal of Hospitality and Tourism Management*, 23(1), 71-84.
96. Hoffman, K. Douglas, Scott W. Kelley and Rotalsky, H.M. (1995), "Tracking service failures and employee recovery efforts," *Journal of Services Marketing*, 9(2), 49-61.
97. Hogueve, Jens, Nicola Bilstein and Leonard Mandl (2017), "Unveiling the recovery time zone of tolerance: When time matters in service recovery," *Journal of the Academy of Marketing Science*, 45(6), 866-883.
98. Holloway, Betsy Bugg, Sijun Wang and Sharon E. Beatty (2009), "Betrayal? Relationship quality implications in service recovery," *Journal of Services Marketing*, 23(6), 385-396.
99. Huang, Jen-Hung and Chiao-Chen Chang (2008), "The effect of personality traits in online consumer complaint behavior and service recovery expectation," *Social Behavior and Personality*, 36(9), 1223-1232.
100. Huang, Wen-Hsien (2010), "Other-customer failure: Effects of perceived employee effort and compensation on complainer and non-complainer service evaluations," *Journal of Service Management*, 21(2), 191-211.
101. Huang, Wen-Hsien and Tzu-Da Lin (2011), "Developing effective service compensation strategies," *Journal of Service Management*, 22(2), 202-216.
102. Hui, Michael K. and Kevin Au (2001), "Justice perceptions of complaint-handling A cross-cultural comparison between PRC and Canadian customers," *Journal of Business Research*, 52, 161-173.
103. Iglesias, Victor, Concepcion Varela-Neira and Rodolfo Vázquez-Casielles (2015). "Why didn't it work out? The effects of attributions on the efficacy of recovery strategies", *Journal of Service Theory and Practice*, 25 (6), 700-724.

104. Iyer, Rajesh and James A. Muncy (2008), "Service recovery in marketing education: It's what we do that counts," *Journal of Marketing Education*, 30(1), 21-32.
105. Johnston, Robert and Adrian Fern (1999). "Service recovery strategies for single and double deviation scenarios," *Service Industries Journal*, 19(2), 69-82.
106. Joireman, Jeff, Yany Grégoire, Berna Devezer and Thomas M. Tripp (2013), "When do customers offer firms a "second chance" following a double deviation? The impact of inferred firm motives on customer revenge and reconciliation," *Journal of Retailing*, 89(3), 315-337.
107. Jones, Tim, Peter A. Dacin and Shirley F. Taylor (2011), "Relational damage and relationship repair: A new look at transgressions in service relationships," *Journal of Service Research*, 14(3), 318-339.
108. Joosten, Herm, Josée Bloemer and Bas Hillebrand (2017), "Consumer control in service recovery: Beyond decisional control," *Journal of Service Management*, 28(3), 499-519.
109. Jung, Na Young and Yoo-Kyoung Seock (2017), "Effect of service recovery on customers' perceived justice, satisfaction, and word-of-mouth intentions on online shopping websites," *Journal of Retailing and Consumer Services*, 37(July), 23-30.
110. Karande, Kiran, Vincent P. Magnini, and Leona Tam (2007), "Recovery voice and satisfaction after service failure: An experimental investigation of mediating and moderating factors," *Journal of Service Research*, 10(2), 187-203.
111. Karatepe, Osman M. (2006), "Customer complaints and organizational responses: The effects of complainants' perception of justice on satisfaction and loyalty," *International Journal of Hospitality Management*, 25(1), 69-90.
112. Karatepe, Osman M. and Erdogan H. Ekiz (2004), "The effects of organizational responses to complaints on satisfaction and loyalty: A study of hotel guests in Northern Cyprus," *Managing Service Quality*, 14(6), 476-486.



113. Kelley, Scott W., K. Douglas Hoffman and Mark A. Davis (1993), "A typology of retail failures and recoveries," *Journal of Retailing*, 69(4), 429-452.
114. Kendall, C.L. and Frederick Russ (1975), "Warranty and complaint policies: An opportunity for marketing management," *Journal of Marketing*, 39(2), 36-43.
115. Kim, Gye-Soo (2007), "The service recovery strategies, customer satisfaction, customer loyalty," *The Asian Journal on Quality*, 8(1), 76-86.
116. Kim, Jong-Heyong and Joseph S. Chen (2010), "The effects of situational and personal characteristics on consumer complaint behavior in restaurant services," *Journal of Travel and Tourism Marketing*, 27(1), 96-112.
117. Kim, Min Gyung, Chenya Wang and Anna S. Mattila (2010), "The relationship between consumer complaining behavior and service recovery," *International Journal of Contemporary Hospitality Management*, 22(7), 975-991.
118. Kim, Namin and Francis M. Ulgado (2012), "The effect of on-the-spot versus delayed compensation: the moderating role of failure severity," *Journal of Services Marketing*, 26(3), 158-167.
119. Kolonsdinsky, Jane (1992), "A system for estimating complaints, complaint resolution and subsequent purchases of professional and personal services," *Journal of Consumer Satisfaction, Dissatisfaction, and Complaining Behavior*, 5, 36-44.
120. Kozub, Kristen R., Martin A. O'Neill and Adrian A. Palmer (2014), "Emotional antecedents and outcomes of service recovery," *Journal of Services Marketing*, 28(3) 233-243.
121. Krishna, Anupam, G.S. Dangayach and Rakesh Jain (2011), "Service recovery: Literature review and research issues," *Journal of Service Science Research*, 3, 71-121.
122. Kude, Thomas, Hartmut Hoehle and Tracy Ann Sykes (2017), "Big data breaches and customer compensation strategies: Personality traits and social influence as antecedents

- of perceived compensation,” *International Journal of Operations and Production Management*, 37(1), 56-74.
123. Kuo, Ying-Feng and Chi-Ming Wu, (2012), “Satisfaction and post-purchase intentions with service recovery of online shopping websites: Perspectives on perceived justice and emotions,” *International Journal of Information Management*, 32(2), 127-138.
  124. Kwon, SoYeon and SooCheong (Shawn) Jang (2012), “Effects of compensation for service recovery: From the equity theory perspective,” *International Journal of Hospitality Management*, 31, 1235-1243.
  125. Larivière, Bart and Dirk Van den Poel (2005), “Investigating the post-complaint period by means of survival analysis,” *Expert Systems with Applications*, 29(3), 667-677.
  126. Lee, Kyuho, Mahmood A. Khan and Jae-Youn Ko (2008), “A cross-national comparison of consumer perceptions of service recovery,” *Journal of Travel and Tourism Marketing*, 24(1), 1-16.
  127. Lee, Eun-Jung and JungKun Park (2010), “Service failures in online double deviation scenarios: Justice theory approach,” *Managing Service Quality*, 20(1), 46-69.
  128. Lee, Myong Jae, Neha Singh and Eric S.W. Chan (2011), “Service failures and recovery actions in the hotel industry: A text-mining approach,” *Journal of Vacation Marketing*, 17(3), 197-207.
  129. Lee, Yun Lok, Beverley A. Sparks and Ken Butcher (2013), “Service encounters and face loss: Issues of failures, fairness, and context,” *International Journal of Hospitality Management*, 34(September), 384-393.
  130. Leong, Jerrold K. and Woo Gon Kim (2002), “Service recovery efforts in fast food restaurants to enhance repeat patronage,” *Journal of Travel and Tourism Marketing*, 12(2-3), 65-93.

131. Levesque, Terrence J. and Gordon H.G. McDougall (2000), "Service problems and recovery strategies: An experiment," *Canadian Journal of Administrative Sciences*, 17(1), 20-37.
132. Lewis, Barbara R. and Pamela McCann, (2004), "Service failure and recovery: Evidence from the hotel industry," *International Journal of Contemporary Hospitality Management*, 16(1), 6-17.
133. Liao, Hui (2007), "Doing it right this time: The role of employee service recovery performance in customer-perceived justice and customer loyalty after service failures," *Journal of Applied Psychology*, 92(2), 475-489.
134. Lii, Yuan-Shuh and Monle Lee (2012), "The joint effects of compensation frames and price levels on service recovery of online pricing error," *Managing Service Quality*, 22(1), 4-20
135. Lin, Chia-Yen (2008), "An evaluation of explanation effects on consumer perceptions," *Social Behavior and Personality*, 36(3), 373-384.
136. Lin, Hsin-Hui, Yi-Shun Wang and Li-Kuan Chang (2011), "Consumer responses to online retailer's service recovery after a service failure," *Managing Service Quality: An International Journal*, 21(5), 511-534.
137. Mack, Rhonda, Rene Mueller, John Crotts and Amanda Broderick (2000), "Perceptions, corrections, and defections: Implications for service recovery in the restaurant industry," *Managing Service Quality*, 10(6), 339-346.
138. Manika, Danae, Savvas Papgiannidis and Michael Bourlakis (2015), "Can a CEO's Youtube apology following a service failure win customers' hearts?," *Technological Forecasting and Social Change*, 95, 87-95.
139. Martin, Charles L. and Denise T. Smart (1994), "Consumer experiences calling toll-free corporate hotlines," *International Journal of Business Communication*, 31(3), 195-212.

140. Mattila, Anna S. (2001), "The effectiveness of service recovery in a multi-industry setting," *Journal of Services Marketing*, 15(7), 583-596.
141. Mattila, Anna S. (2001), "The impact of relationship type on customer loyalty in a context of service failures," *Journal of Service Research*, 4(2), 91-101.
142. Mattila, Anna S. (2004), "The impact of service failures on customer loyalty: The moderating role of affective commitment," *International Journal of Service Industry Management*, 15(2), 134-149.
143. Mattila, Anna S. (2006). "The power of explanations in mitigating the ill-effects of service failures," *Journal of Services Marketing*, 20(6/7), 422-428.
144. Mattila, Anna S. (2010), "Do women like options more than men? An examination in the context of service recovery," *Journal of Services Marketing*, 24(7), 499-508.
145. Mattila, Anna S. and Sunmee Choi (2012), "Societal norms, need for closure, and service recovery," *Journal of International Consumer Marketing*, 24(5), 356-371.
146. Mattila, Anna S. and David Cranage (2005), "The impact of choice on fairness in the context of service recovery," *Journal of Services Marketing*, 19(5), 271-279.
147. Mattila, Anna S. and Daniel J. Mount (2004), "The impact of selected customer characteristics and response time on e-complaint satisfaction and return intent," *International Journal of Hospitality Management*, 22(2), 135-145.
148. Mattila, Anna S. and Daniel J. Mount (2006), "The impact of timeliness on complaint satisfaction in the context of call-centers," *Journal of Hospitality and Leisure Marketing*, 14(3), 5-16.
149. Mattila, Anna S. and Paul G. Patterson (2004), "Service recovery and fairness perceptions in collectivist and individualist contexts," *Journal of Service Research*, 6, 336-346.

150. Mattila, Anna S. and Paul G. Patterson (2004), "The impact of culture on consumers' perceptions of service recovery efforts," *Journal of Retailing*, 80(3), 196-206.
151. Mattila, Anna S., Wonae Cho and Heejung (Cheyenne) Ro (2009), "The joint effects of service failure mode, recovery effort, and gender on customers' post-recovery satisfaction," *Journal of Travel & Tourism Marketing*, 26(2), 120-128.
152. Mattila, Anna S., Wonae Cho and Heejung (Cheyenne) Ro (2011), "The role of self-service technologies in restoring justice," *Journal of Business Research*, 64(4), 348–355.
153. Mattila, Anna S., Luisa Andreau, Lydia Hanks, Ellen E. Kim, (2013) "The impact of cyberostracism on online complaint handling: Is "automatic reply" any better than "no reply"?", *International Journal of Retail and Distribution Management*, 41(1), 45-60.
154. Mazaheri, Ebrahim, Debra Z. Basil, Venkata Yanamandram, and Zoltan Daroczi (2011), "The impact of pre-existing attitude and conflict management style on customer satisfaction with service recovery," *Journal of Retailing and Consumer Services*, 18(3), 235-245.
155. McColl-Kennedy, Janet, Catherine S. Daus, and Beverley A. Sparks (2003), "The role of gender in reactions to service failure and recovery," *Journal of Service Research*, 6(1), 66-82.
156. McCollough, Michael A. (2009), "The recovery paradox: The effect of recovery performance and service failure severity on post-recovery customer satisfaction," *Academy of Marketing Studies Journal*, 13(1), 89-104.
157. McCollough, Michael A., Leonard L. Berry and Manjit Yadav (2000), "An empirical investigation of customer satisfaction after service failure and recovery," *Journal of Service Research*, 3(2), 121-37.

158. McQuilken, Lisa (2010), "The influence of failure severity and employee effort on service recovery in a service guarantee context," *Australasian Marketing Journal*, 18(4), 214-221.
159. McQuilken, Lisa and Nichola Robertson (2011), "The influence of guarantees, active requests to voice and failure severity on customer complaining behavior," *International Journal of Hospitality Management*, 30(4), 953-962.
160. McQuilken, Lisa, Heath McDonald and Andrea Vocino (2013), "Is guarantee compensation enough? The important role of fix and employee effort in restoring justice," *International Journal of Hospitality Management*, 33, 41-50.
161. Mikolon, Sven, Benjamin Quaiser and Jan Wieseke (2015), "Don't try harder: using customer inoculation to build resistance against service failures," *Journal of the Academy of Marketing Science*, 43, 512-527.
162. Morris, Susan V. (1988), "How many lost customers have you won back today? An aggressive approach to complaint handling in the hotel industry," *Journal of Consumer Satisfaction, Dissatisfaction, and Complaining Behavior*, 1, 86-92.
163. Morrisson, Olivier and John W. Huppertz (2010), "External equity, loyalty program membership, and service recovery," *Journal of Services Marketing*, 24(3), 244-254.
164. Mostafa, Rania B., Cristiana R. Lages and Maria Sääksjärvi, M. (2014), "The CURE scale: multidimensional measure of service recovery strategy," *Journal of Services Marketing*, 28(4), 300-310.
165. Mostafa, Rania B., Cristiana R. Lages, Haseeb A. Shabbir and Des Thwaites (2015), "Corporate image: A service recovery perspective," *Journal of Service Research*, 18(4), 468-483.
166. Mostert, Pierre, Christine F. De Meyer and Renier Jansen van Rensburg (2009), "The influence of service failure and service recovery on airline passengers' relationships

- with domestic airlines: An exploratory study,” *Southern African Business Review*, 13(2), 118-140.
167. Mount, Daniel J. and Anna S. Mattila (2000), “The final opportunity: The effectiveness of a customer relations call center in recovering hotel guests,” *Journal of Hospitality and Tourism Research*, 24(4), 514-525.
168. Nguyen, Doan T. and Janet R. McColl-Kennedy (2003), “Diffusing customer anger in service recovery: A conceptual framework,” *Australasian Marketing Journal*, 11(2), 46-55.
169. Nguyen, Doan T., Janet R. McColl-Kennedy, and Tracey S. Dagger (2012), “Matching service recovery solutions to customer recovery preferences,” *European Journal of Marketing*, 46(9), 1171-1194.
170. Noone, Breffni M. (2012), “Overcompensating for severe service failure: perceived fairness and effect on negative word-of-mouth intent,” *Journal of Services Marketing*, 26(5), 342-351.
171. Noone, Breffni M. and Chung Hun Lee (2010), “Hotel overbooking: The effect of overcompensation on customers’ reactions to denied service,” *Journal of Hospitality and Tourism Research*, 35(3), 334-357.
172. Nyer, Prashanth U. (2000), “An investigation into whether complaining can cause increased customer satisfaction,” *Journal of Consumer Marketing*, 17(1), 9-19.
173. Ok, Chihyung, Ki-Joon Back, and Carol W. Shanklin (2005), “Modeling roles of service recovery strategy: A relationship-focused view,” *Journal of Hospitality and Tourism Research*, 29(4), 484-507.
174. Ok, Chihyung, Ki-Joon Back, and Carol W. Shanklin (2007), “Mixed findings on the service recovery paradox,” *Service Industries Journal*, 27(6), 671-686.

175. Ong, Chin Eang and David Teh (2016), "Redress procedures expected by consumers during a business-to-consumer e-commerce dispute," *Electronic Commerce Research and Applications*, 17(May-June), 150-160.
176. Park, Joohyung and Sejin Ha (2016), "Co-creation of service recovery: Utilitarian and hedonic value and post-recovery responses," *Journal of Retailing and Consumer Services*, 28(January), 310-316.
177. Patterson, Paul G., Elisabeth Cowley, and Kriengsin Prasongsukarn (2006), "Service failure recovery: The moderating impact of individual-level cultural value orientation on perceptions of justice," *International Journal of Research in Marketing*, 23(3), 263-277.
178. Pranic, Ljudevit and Wesley S. Roehl (2012), "Rethinking service recovery: A customer empowerment perspective," *Journal of Business Economics and Management*, 13(2), 242-260.
179. Prasongsukarn, Kriengsin and Paul G. Patterson (2012), "An extended service recovery model: The moderating impact of temporal sequence of events," *Journal of Services Marketing*, 26(7), 510-520.
180. Pugh, Harrison B., Michael K. Brady and Lucas M. Hopkins (2018), "A customer scorned: Effects of employee reprimands in frontline service encounters," *Journal of Service Research*, 21(2), 219-234.
181. Rasoulilian, Shahin, Yany Grégoire, Renaud Legoux, and Sylvain Sénécal (2017), "Service crisis recovery and firm performance: Insights from information breach announcements," *Journal of the Academy of Marketing Science*, 45(6), 45(6), 789-806.
182. Ro, Heejung and June Wong (2012), "Customer opportunistic complaints management: A critical incident approach," *International Journal of Hospitality Management*, 31(2), 419-427.



183. Robertson, Nichola and Robin N. Shaw (2009), "Predicting the likelihood of voiced complaints in the self-service technology context," *Journal of Service Research*, 12(1), 100-116.
184. Roggeveen, A.L., Tsiros, M. and Grewal, D. (2012). "Understanding the co-creation effect: when does collaborating with customers provide a lift to service recovery?," *Journal of the Academy of Marketing Science*, 40, 771-790.
185. Roschk, Holger and Katja Gelbrich (2014). "Identifying appropriate compensation types for service failures: A meta-analytic and experimental analysis," *Journal of Service Research*, 17(2), 195-211.
186. Roschk, Holger and Katja Gelbrich (2017), "Compensation revisited: A social resource theory perspective on offering a monetary resource after a service failure," *Journal of Service Research*, 20(4), 393-408.
187. Roschk, Holger, and Susanne Kaiser (2013), "The nature of an apology: An experimental study on how to apologize after a service failure," *Marketing Letters*, 24(3), 293-309.
188. Roschk, Holger, Jana Müller and Katja Gelbrich (2013). "Age matters: How developmental stages of adulthood affect customer reaction to complaint handling efforts", *Journal of Retailing and Consumer Services*, 20, 154–164.
189. Russell-Bennett, R, Hartel, C.E.J., and Drennan, J. (2010), "Consumer satisfaction and redress with a government third-party complaints agency," *Journal of Consumer Satisfaction, Dissatisfaction, and Complaining Behavior*, 23, 65-82.
190. Ryngelblum, Arnaldo L., Nadia W.H. Vianna, and Celso A. Rimoli (2013), "The ways companies really answer consumer complaints," *Marketing Intelligence and Planning*, 31(1), 54-71.

191. Sengupta, Sanchayan, Daniel Ray, Olivier Trendel, and Yves Van Vaerenbergh (2018), "The effect of apologies for service failures in the global online retail," *International Journal of Electronic Commerce*, 22(3), 419-445.
192. Shapiro, Terri and Jennifer Nieman-Gonder (2006), "Effect of communication mode in justice-based service recovery," *Managing Service Quality: An International Journal*, 16(2), 124-144.
193. Simon, Françoise (2013), "The influence of empathy in complaint handling: Evidence of grateful and transactional routes to loyalty," *Journal of Retailing and Consumer Services*, 20(6), 599-608.
194. Singh, Vaishali, Amit Jain and Sapna Choraria (2014), "Exploring the role of complaint handling among complaining consumers," *Vision: The Journal of Business Perspective*, 20(4), 331-344.
195. Smith, Amy K. and Ruth N. Bolton (2002), "The effect of customers' emotional responses to service failures on the recovery effort evaluations and satisfaction judgments," *Journal of the Academy of Marketing Science*, 30(1), 5-23.
196. Smith, Amy K., Ruth N. Bolton, and Janet Wagner (1999), "A model of customer satisfaction with service encounters involving failure and recovery," *Journal of Marketing Research*, 36(3), 356-72.
197. Sparks, Beverley A. and Graham Bradley (2014), "A 'Triple A' typology of responding to negative consumer-generated online reviews," *Journal of Hospitality and Tourism Research*, 41(6), 719-745.
198. Sparks, Beverley A. and Victor J. Callan (1996), "Service breakdowns and service evaluations: The role of customer attributions," *Journal of Hospitality and Leisure Marketing*, 4(2), 3-24.

199. Sparks, Beverley A. and Liz Fredline (2007), "Providing an explanation for service failure: Context, content, and customer responses," *Journal of Hospitality and Tourism Research*, 31(2), 241-260.
200. Sparks, Beverley A. and Janet McColl-Kennedy (2001), "Justice strategy options for increased customer satisfaction in a services recovery setting," *Journal of Business Research*, 54, 209-18.
201. Stauss, Bernd (2002), "The dimensions of complaint satisfaction: Process and outcome complaint satisfaction versus cold fact and warm act complaint satisfaction," *Managing Service Quality*, 12(3), 173-183.
202. Steyn, T.F.J., Pierre Mostert, Christine F. De Meyer and Renier Jansen van Rensburg (2011), "The effect of service failure and recovery on airline-passenger relationships: A comparison between South African and United States airline passengers," *Journal of Management Policy and Practice*, 12(5), 105-115.
203. Strauss, Judy and Donna J. Hill (2001), "Consumer complaints by e-mail: An exploratory investigation of corporate responses and customer reactions," *Journal of Interactive Marketing*, 15(1), 63-73.
204. Sugathan, Praveen, Kumar Rakesh Ranjan and Avinash G. Mulky (2017), "Atypical shifts post-failure: Influence of co-creation on attribution and future motivation to co-create," *Journal of Interactive Marketing*, 38(May), 64-81.
205. Swanson, Scott R. and Scott W. Kelley (2001), "Attributions and outcomes of the service recovery process," *Journal of Marketing Theory and Practice*, 9(4), 50-65)
206. Tax, Stephen S., Stephen W. Brown, and Murali Chandrashekar (1998), "Customer evaluations of service complaint experiences: Implications for relationship marketing," *Journal of Marketing*, 62(April), 60-76.

207. Tsai Chia-Ching, Yung-Kai Yang and Yu-Chi Cheng (2014), "Does relationship matter? Customers' response to service failure," *Managing Service Quality*, 24(2), 139-159.
208. Valenzuela, Fredy-Roberto and Ray Cooksey (2014), "Australian retail banking customers' perceptions of time in a service recovery process," *Contemporary Management Research*, 10(2), 123-146.
209. Van Vaerenbergh, Yves, Bart Larivière and Iris Vermeir (2012), "The impact of process recovery communication on customer satisfaction, repurchase intentions, and word-of-mouth intentions," *Journal of Service Research*, 15(3), 262-279.
210. Varela-Neira, Concepción, Rodolfo Vázquez-Casielles, and Victor Iglesias (2010), "The effects of customer age and recovery strategies in a service failure setting," *Journal of Financial Services Marketing*, 15(1), 32-48.
211. Vazquez-Casielles, Rodolfo, Victor Iglesias, and Concepcion Varela-Neira (2012), "Service recovery, satisfaction and behaviour intentions: analysis of compensation and social comparison communication strategies," *The Service Industries Journal*, 32(1), 83-103.
212. Vazquez-Casielles, Rodolfo, Victor Iglesias, and Concepcion Varela-Neira (2017), "Co-creation and service recovery process communication: Effects on satisfaction, repurchase intentions, and word of mouth," *Service Business*, 11(2), 321-343.
213. Wang, Chen-Ya and Anna S. Mattila (2011), "A cross-cultural comparison of perceived informational fairness with service failure explanations", *Journal of Services Marketing*, 25(6), 429-439.
214. Wang, Chen-Ya, Anna S. Mattila and Albert Bartlett (2009), "An examination of explanation typology on perceived informational fairness in the context of air travel," *Journal of Travel and Tourism Marketing*, 26(8), 795-805.

215. Wang, XiaoRan and Omar Rozeyta (2014), "Service recovery activities and customer satisfaction: mediating role of justice dimensions: A case study of china," *Asian Social Science*, 10(18), 253-261.
216. Watson, Stevie (2012), "Consumer responses to service situations: Tests for main and interaction effects," *Journal of Retailing and Consumer Services*, 19(3), 287-296.
217. Webster, Cynthia and D.S. Sundaram (1998), "Service consumption criticality in failure recovery," *Journal of Business Research*, 41, 153-159.
218. Weun, Seungoo, Sharon E. Beatty and Michael A. Jones (2004), "The impact of service failure severity on service recovery evaluations and post-recovery relationships," *Journal of Services Marketing*, 18(2), 133-146.
219. Wirtz, Jochen and Mattila, Anna S. (2004), "Consumer responses to compensation, speed of recovery and apology after a service failure," *International Journal of Service Industry Management*, 15(2), 150-166.
220. Wirtz, Jochen, and Janet R. McColl-Kennedy (2010), "Opportunistic customer complaining during service recovery," *Journal of the Academy of Marketing Science*, 38(5), 654-675.
221. Wooten, David B. (2009), "Say the right thing: Apology, reputability, and punishment," *Journal of Consumer Psychology*, 19(2), 225-235.
222. Worsfold, Kate, Jennifer Worsfold and Graham Bradley (2007), "Interactive effects of proactive and reactive service recovery strategies: The case of rapport and compensation," *Journal of Applied Social Psychology*, 37(11), 2496-2517.
223. Wu, Wann-Yih, Ya-Chung Hou, Chen-Su Fu and Chi-Ya Chang (2013), "Identifying failure recovery strategies for paper industrial suppliers," *Industrial Marketing Management* 42, 1233–1244.

224. Xu, Yingzi, Roger Marshall, Bo Edvardsson and Bård Tronvoll, B. (2014), "Show you care: initiating co-creation in service recovery," *Journal of Service Management*, 25(3), 369-387.
225. Xu, Yingzi, Bård Tronvoll and Bo Edvardsson (2014b), "Recovering service failure through resource integration," *Service Industries Journal*, 34(16), 1253-1271.
226. Yang, Ting Chi (2005), "The development of an effective recovery program after service failures: A case study of restaurants in Glasgow," *Tourism and Hospitality Planning and Development*, 2(1), 39-54.
227. Yavas, Ugur, Osman M. Karatepe, Emin Babakus and Turgay Avci (2004), "Customer complaints and organizational responses: A study of hotel guests in northern cyprus," *Journal of Hospitality and Leisure Marketing*, 11(2-3), 31-46.
228. Zhao, Xinyuan, Yuhzu Liu, Haixia Bi and Rob Law (2014), "Influence of coupons on online travel reservation service recovery," *Journal of Hospitality and Tourism Management*, 21, 18-26.
229. Zhou, YuanYuan, Minxue Huang, Alex S.L. Tsang and Nan Zhou (2013), "Recovery strategy for group service failures," *European Journal of Marketing*, 47(8), 1133-1156.
230. Zhou, YuanYuan, Alex S.L. Tsang, Minxue Huang and Nan Zhou (2014), "Does delaying service failure resolution ever make sense?," *Journal of Business Research*, 67(2), 159-166.
